# Supplementary material
Source: publisher figshare collection journal article supplement (https://gsapubs.figshare.com/ndownloader/files/22739789)
Supplement: Supplementary file 1 [file 22739789]

GSA Data Repository Item # 8415

Title of article Climate and ephemeral-stream processes: Twentieth-century  
geomorphology and alluvial stratigraphy of the Little Colorado River, Arizona

Author(s) Richard Hereford

see GSA Bulletin v. 95, p. 654 - 668

Contents 2 pages

Tables A & B

---

---

---

---

---

---

---

---

---

---

TABLE A. Location and name of study areas, area and scale of flood-plain maps, number of sediment samples, width of channel and flood plain, and channel slope

| Study area                 | Location                                                                              | Area mapped                          |       | Sediment samples | Width (m) |             | Channel slope           |
|----------------------------|---------------------------------------------------------------------------------------|--------------------------------------|-------|------------------|-----------|-------------|-------------------------|
|                            |                                                                                       | ( X 10 <sup>3</sup> m <sup>2</sup> ) | Scale |                  | Channel   | Flood plain |                         |
| Winslow                    | SE 1/4 NE 1/4 sec. 17,<br>T. 19 N., R. 16 E.<br>Winslow quad. (1954)                  | 63.4                                 | 1:720 | 24               | 96.0      | NM          | 6.72 x 10 <sup>-3</sup> |
| Tolchico                   | 2.7 km upstream<br>from Tolchico<br>(ruins); Grand<br>Falls quad. (1969)              | 174.4                                | 1:600 | 30               | 93.0      | 133.2       | 2.19 x 10 <sup>-4</sup> |
| Grand Falls                | 0.2 km downstream from<br>Grand Falls gauging<br>station; Grand Falls<br>quad. (1969) | 18.0                                 | 1:360 | ..               | 47.2      | 20.4        | 1.38 x 10 <sup>-3</sup> |
| Black Falls                | 1.5 km downstream from<br>Black Falls Crossing;<br>Wupatki SE quad.<br>(1969)         | 51.8                                 | 1:600 | 27               | 109.7     | NM          | 7.85 x 10 <sup>-4</sup> |
| Cameron                    | 0.2 km upstream from<br>Cameron bridge;<br>Cameron quad. (1955)                       | 63.4                                 | 1:720 | 14               | 95.1      | 71.9        | 9.99 x 10 <sup>-4</sup> |
| Moenkopi Wash<br>Southeast | 0.3 km northwest of<br>confluence; Cameron<br>quad. (1955)                            | 51.8                                 | 1:600 | 12               | 51.2      | 82.6        | 1.39 x 10 <sup>-3</sup> |
| Moenkopi Wash<br>Northwest | 1.5 km northwest of<br>confluence; Cameron<br>quad. (1955)                            | 51.8                                 | 1:600 | ..               | 55.8      | 66.5        | 1.25 x 10 <sup>-3</sup> |

Note: NM = not mapped.

Table B. History of salt cedar in the Little Colorado River valley and surrounding region

| Date(s)     | Area                                | Event or observation                                                                                                                          | Reference                                                                           |
|-------------|-------------------------------------|-----------------------------------------------------------------------------------------------------------------------------------------------|-------------------------------------------------------------------------------------|
| 1854        | California                          | Salt cedar introduced into the western United States and sold by nurseries in California as an ornamental tree or shrub                       | Robinson (1965, p. A4)                                                              |
| 1854        | Study area                          | Cottonwood is the only vegetation described by the botanist J. M. Bigelow.                                                                    | Bigelow (1856)                                                                      |
| 1890        | Northern Arizona                    | Floral list compiled by C. Hart Merriam (biologist who developed the life-zone system of vegetation distribution) does not include salt cedar | Christensen (1962, p. 53)                                                           |
| 1896--1926  | Study area                          | Photographs of the river channel taken by early tourists at Cameron, Grand Falls, and Holbrook have no salt cedar in them.                    | Special Collections Library<br>Northern Arizona University                          |
| 1902--1909  | Tolchico                            | Photographs of river show numerous cottonwood but no salt cedar.                                                                              | <u>Ibid.</u>                                                                        |
| <u>1909</u> | Winslow                             | Salt cedar growing under cultivation within 1 km of Little Colorado                                                                           | Robinson (1965, Table 1)                                                            |
| 1921        | Winslow                             | Salt cedar not present in photograph of channel or in vegetation description                                                                  | Strahorn and others (1924, Pl. 1)                                                   |
| 1923        | Grand Falls,<br>Moenkopi Wash       | Driftwood from largest recorded flood does not contain salt cedar                                                                             | This study                                                                          |
| 1929        | Grand Falls                         | Driftwood from second largest flood does not contain salt cedar                                                                               | This study                                                                          |
| 1930--1931  | Joseph City<br>(east of<br>Winslow) | Direct observation indicates salt cedar not present in river channel from Joseph City upstream to confluence with Rio Puerco                  | T. A. Maddock, Jr., (1981,<br>personal commun.)                                     |
| 1936        | Study area                          | Groves or stands of salt cedar not present between Cameron and Winslow in aerial photographs                                                  | U.S. Soil Conservation Service<br>aerial photographs,<br>approximate scale 1:27,000 |
| <u>1937</u> | Grand Falls                         | Salt cedar beginning to appear on sandy river flats                                                                                           | Colton (1937, p. 20)                                                                |
| <u>1938</u> | Winslow                             | Young salt cedar present in photographs of channel                                                                                            | Lockett and Snow (1939)                                                             |
| 1942        | Leupp                               | Salt cedar not mentioned in description of vegetation                                                                                         | Thorntwaite and others (1942)                                                       |
| <u>1954</u> | Study area                          | Salt cedar groves and stands present in aerial photographs                                                                                    | U.S. Army Map Service aerial<br>photographs, approximate scale<br>scale 1:54,000    |
| <u>1955</u> | Cameron                             | Green wooded symbol along river in the Cameron topographic map = salt-cedar groves and flood plain                                            | Cameron 15' quad. (1955)                                                            |
| <u>1955</u> | Leupp                               | Green scrub symbol along river in the Leupp topographic map = salt-cedar groves                                                               | Leupp 15' quad. (1955)                                                              |
| <u>1960</u> | Polacca Wash                        | Salt cedar in channel                                                                                                                         | Hadley (1961)                                                                       |
| <u>1968</u> | Study area                          | Salt cedar conspicuous in aerial photographs                                                                                                  | U.S. Geological Survey aerial<br>photographs, approximate scale<br>1:24,000         |

Note: dates in italic indicate presence of salt cedar.
